# Supplementary material
Source: PubMed Central journal article supplement (PMC5717201)
Supplement: AEM.01475-17_zam999118183s1.pdf [file AEM.01475-17_zam999118183s1.pdf]

1 **Supplementary Material**

2 **Synergistic effect in core microbiota associated with sulfur metabolism in**  
3 **spontaneous Chinese liquor fermentation**

4  
5 Jun Liu,<sup>a,b</sup> Qun Wu,<sup>a,b\*</sup> Peng Wang,<sup>a,b</sup> Jianchun Lin,<sup>a,b</sup> Ling Huang,<sup>a,b</sup> Yan Xu<sup>a,b\*</sup>

6 State Key Laboratory of Food Science and Technology, Key Laboratory of Industrial  
7 Biotechnology, Ministry of Education <sup>a</sup>; Synergetic Innovation Center of Food Safety  
8 and Nutrition, School of Biotechnology, Jiangnan University, Wuxi, Jiangsu, China <sup>b</sup>.

9  
10  
11 \* Corresponding authors:

12 State Key Laboratory of Food Science and Technology; The Key Laboratory of  
13 Industrial Biotechnology, Ministry of Education; Synergetic Innovation Center of  
14 Food Safety and Nutrition; School of Biotechnology, Jiangnan University, Wuxi,  
15 Jiangsu, China, 214122

16 Phone: +86-510-85918201

17 Fax: +86-510-85864112

18 E-mail: [wuq@jiangnan.edu.cn](mailto:wuq@jiangnan.edu.cn) or [yxu@jiangnan.edu.cn](mailto:yxu@jiangnan.edu.cn)

19  
20 Running Title: Interaction between *Saccharomyces* and *Lactobacillus*

25 **FIGURES**

26

27

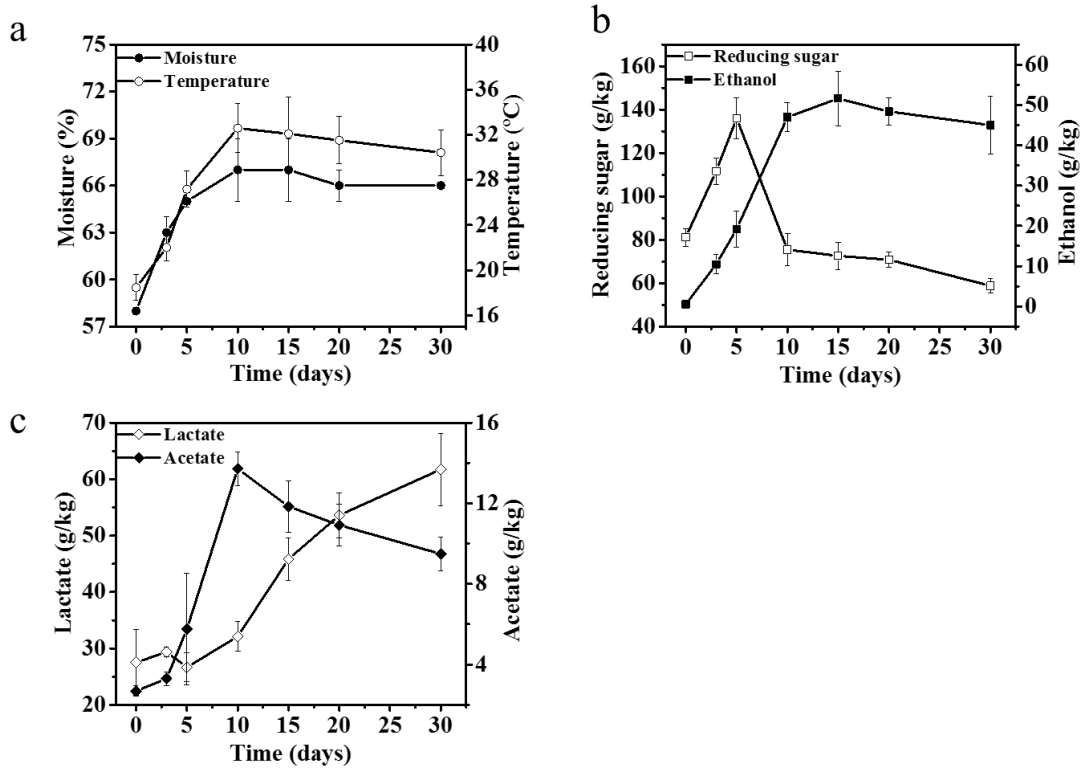

28

29 FIG S1. Dynamics of physicochemical parameters during the fermentation processes.

30 (a) Moisture and temperature. (b) Reducing sugar and ethanol. (c) lactate and acetate.

31 Data are shown as mean  $\pm$  SD (n = 4).

32

33

34

35

36

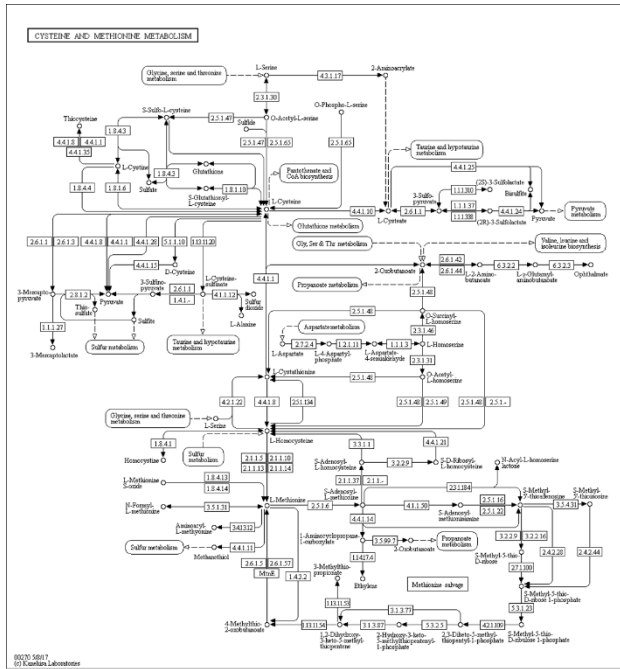

ko00270

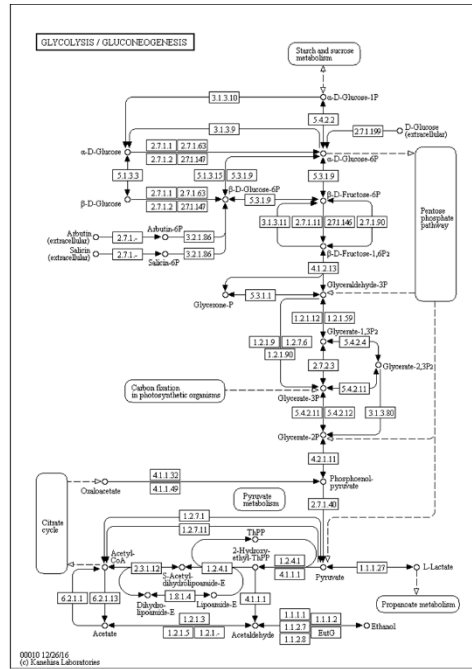

ko00010

37

38 FIG S2 The KEGG pathway associated with the synthesis of methionine, conversion

39 of sulfur sources and generation of 3-(methylthio)-1-propanol and dimethyl disulfide.

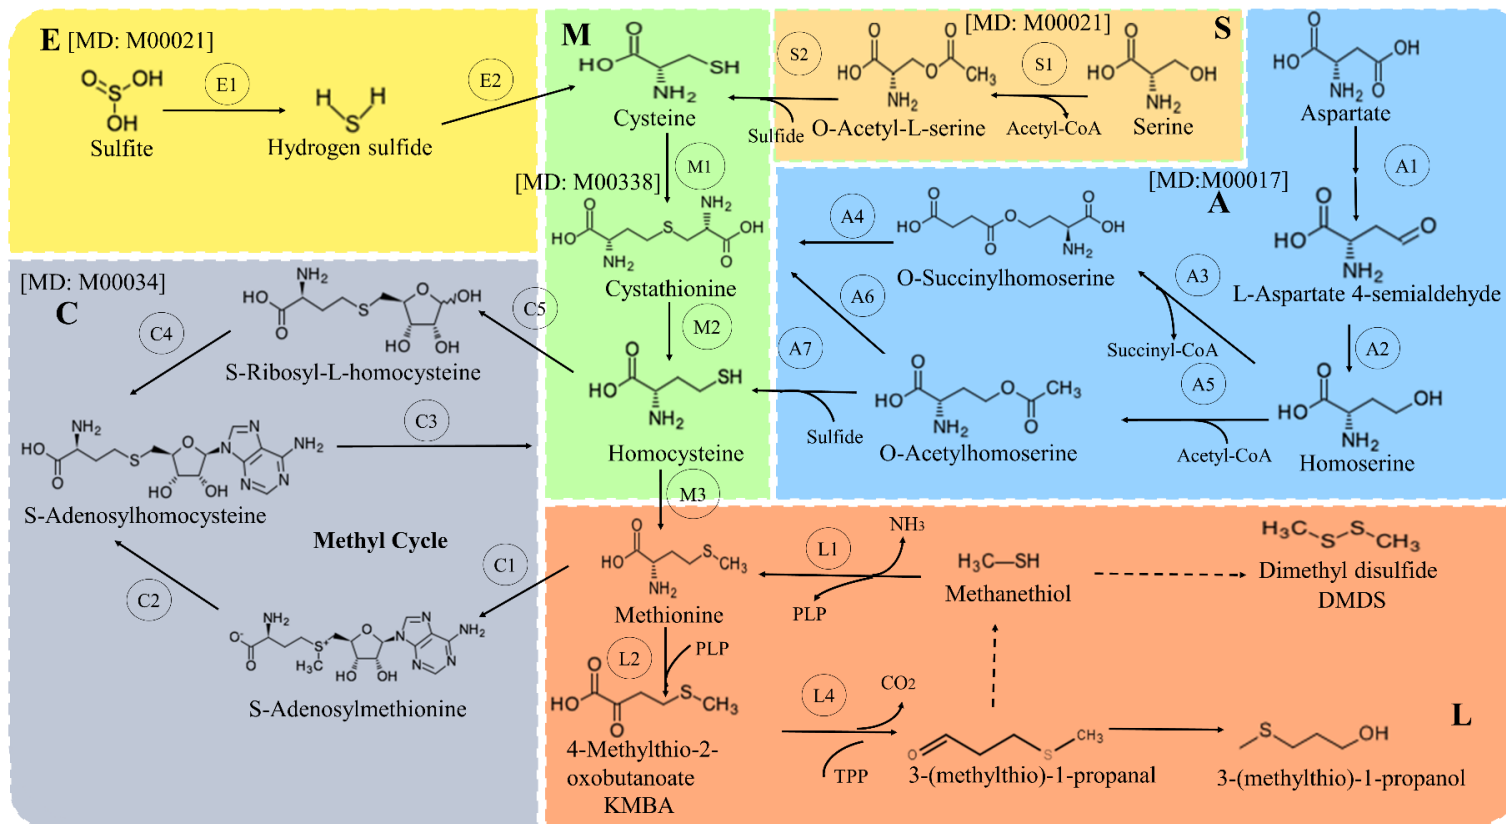

40

41 FIG S3 The predicted sulfur metabolic network for generation of 3-(methylthio)-1-propanol and dimethyl disulfide, synthesis of methionine,  
 42 conversion of sulfur source.

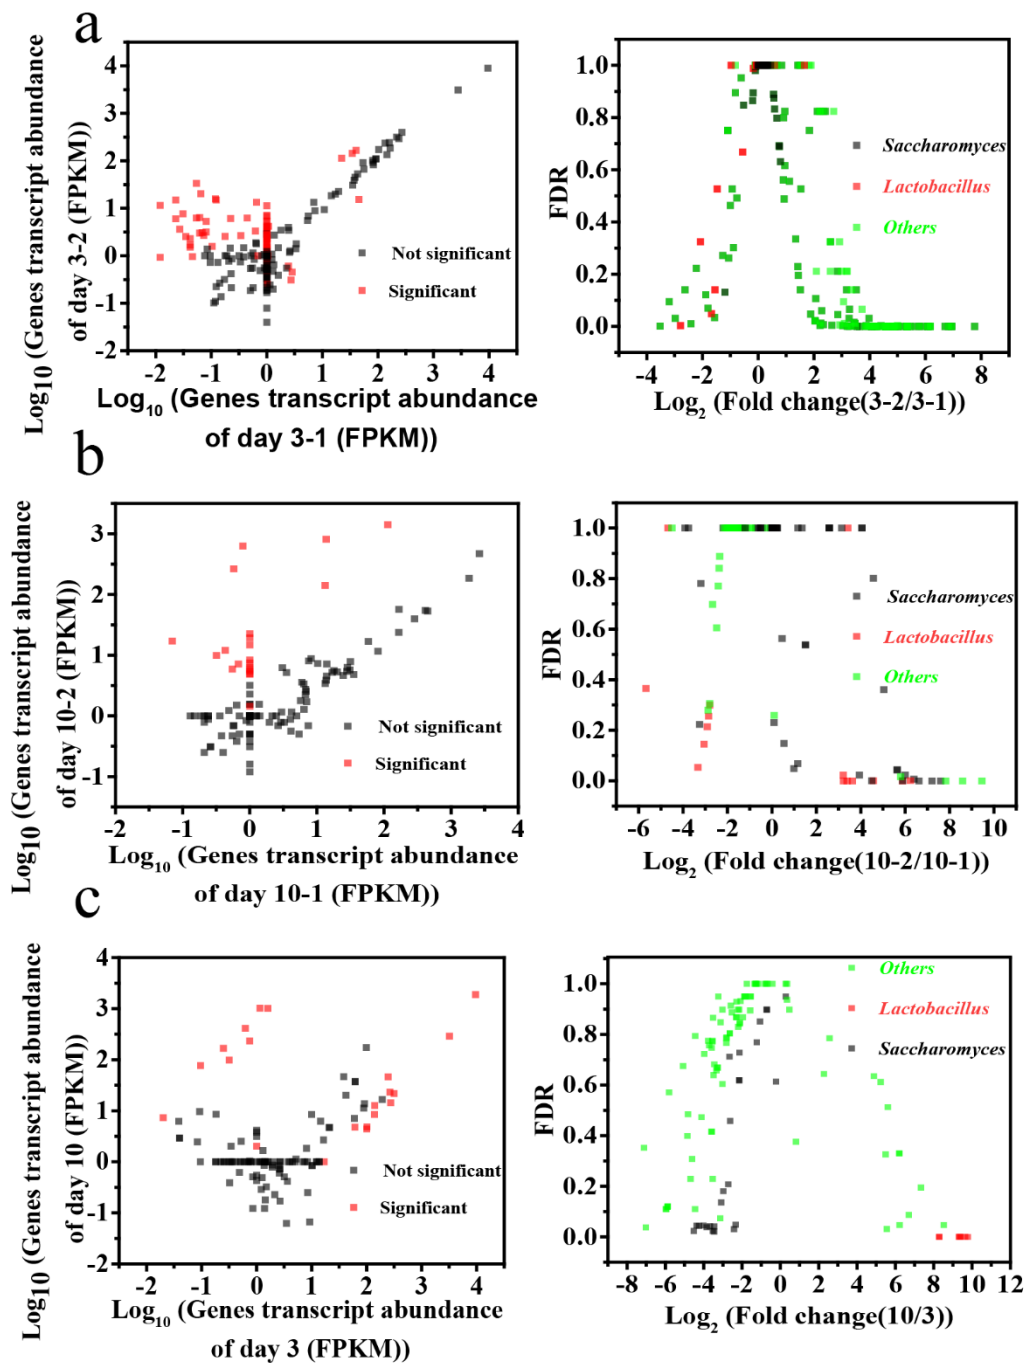

43

44 FIG S4 The statistical testing results of genes transcriptions in sulfur metabolic  
 45 pattern, and each dot represents one coding sequences. The statistical testing analysis  
 46 of the two biological replicates in dya 3 (3-1, 3-2) (a) and in day 10 (10-1, 10-2). (b)  
 47 The statistical testing results of genes transcription profile between day 3 and day 10  
 48 (c).

49

a

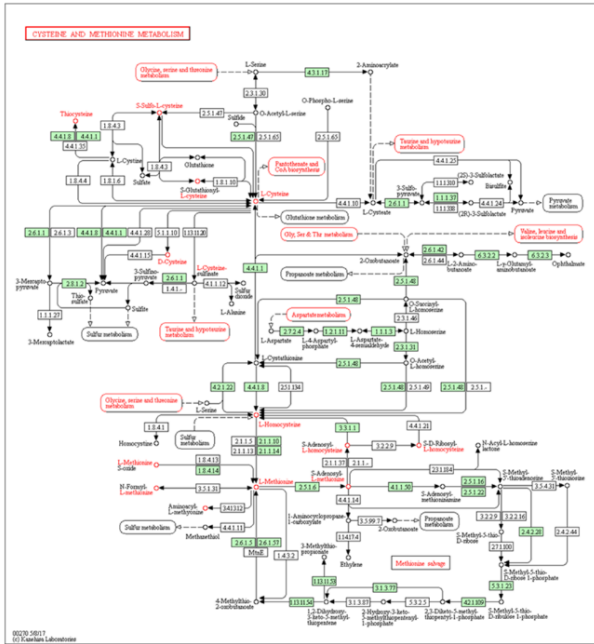

ko00270

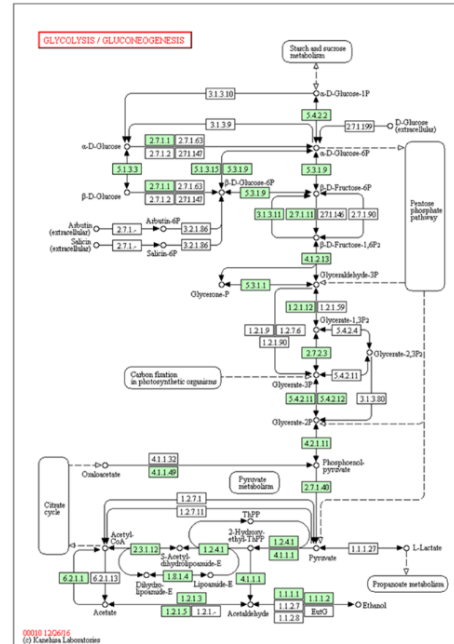

ko00010

b

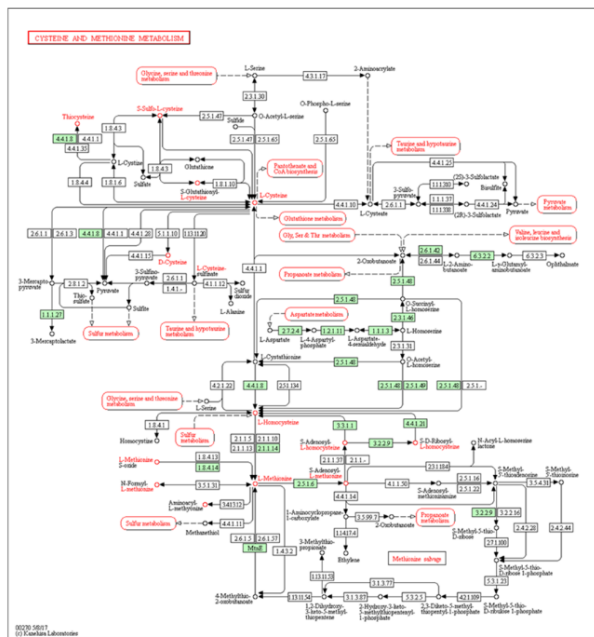

ko00270

50 FIG S5 The KEGG pathway associated with 3-(methylthio)-1-propanol and dimethyl  
 51 disulfide of *S. cerevisiae* (a). and methyl cycle pathway of *L. buchneri* (b).

52 **TABLES**

53 Table S1 Summary of the metatranscriptomic sequencing assembly information.

| Data              | 3-1         | 3-2         | 10-1        | 10-2        |
|-------------------|-------------|-------------|-------------|-------------|
| Insert size(bp)   | 250         | 250         | 250         | 250         |
| Read length(bp)   | 150         | 150         | 150         | 150         |
| Raw reads         | 164177322   | 155669670   | 138719046   | 127993572   |
| Raw bases (bp)    | 24626598300 | 23350450500 | 20807856900 | 19199035800 |
| Clean reads       | 161014964   | 152831948   | 136080680   | 125546508   |
| Clean bases (bp)  | 22996584167 | 21646209707 | 19713007177 | 18089122586 |
| Percent in raw    | 98.1        | 98.2        | 98.1        | 98.1        |
| Non-rRNA          | 67718588    | 46970100    | 53736208    | 75340206    |
| Percent in raw    | 41.2        | 30.2        | 38.7        | 58.9        |
| Sequences         | 11862       | 34573       | 10887       | 8264        |
| Sequences bases   | 16167654    | 33828138    | 16167654    | 9014791     |
| N50 (bp)          | 2665        | 1541        | 2398        | 1776        |
| N90 (bp)          | 470         | 392         | 450         | 403         |
| Max (bp)          | 23527       | 21206       | 76654       | 48348       |
| Min (bp)          | 300         | 300         | 300         | 300         |
| ORFs              | 9150        | 24859       | 9321        | 6758        |
| Total length (bp) | 9445638     | 19247766    | 7975278     | 5024652     |
| Average length    | 1032        | 774         | 856         | 744         |
| Max (bp)          | 14706       | 14706       | 18177       | 12702       |
| Min (bp)          | 123         | 123         | 123         | 123         |

55 **Table S2** Details information of the 31 enzymes associated with generation of sulfur compounds, synthesis of methionine and conversion of  
 56 sulfur sources.

| Enzymes | Reactions | EC number of enzymes | Entry  | Pathway | Enzyme name                                   |
|---------|-----------|----------------------|--------|---------|-----------------------------------------------|
| 1       | A1        | [EC:2.7.2.4]         | K00928 | ko00270 | aspartate kinase                              |
| 2       | A1        | [EC:1.2.1.11]        | K00133 | ko00270 | aspartate-semialdehyde dehydrogenase          |
| 3       | A2        | [EC:1.1.1.3]         | K00003 | ko00270 | homoserine dehydrogenase                      |
| 4       | A3        | [EC:2.3.1.46]        | K00651 | ko00270 | homoserine O-succinyltransferase              |
| 5       | A4, A6    | [EC:2.5.1.48]        | K01739 | ko00270 | cystathionine gamma-synthase                  |
| 6       | A5        | [EC:2.3.1.31]        | K00641 | ko00270 | homoserine O-acetyltransferase                |
| 7       | A7        | [EC:2.5.1.49]        | K01740 | ko00270 | O-acetylhomoserine (thiol)-lyase              |
| 8       | C1        | [EC:2.5.1.6]         | K00789 | ko00270 | S-adenosylmethionine synthetase               |
| 9       | C2        | [EC:2.1.1.37]        | K00558 | ko00270 | DNA (cytosine-5-)-methyltransferase           |
| 10      | C3        | [EC:3.3.1.1]         | K01251 | ko00270 | adenosylhomocysteinase                        |
| 11      | C4        | [EC:3.2.2.9]         | K01243 | ko00270 | S-adenosylhomocysteine/5'-methylthioadenosine |



|    |        |                                |        |         |                                            |
|----|--------|--------------------------------|--------|---------|--------------------------------------------|
| 12 | C5     | [EC:4.4.1.21]                  | K07173 | ko00270 | S-ribosylhomocysteine lyase                |
| 13 | E1     | [EC:1.8.1.2]                   | K00381 | ko00270 | sulfite reductase (NADPH) hemoprotein      |
| 14 | E1     | [EC:1.8.1.2]                   | K00380 | ko00270 | sulfite reductase (NADPH) flavoprotein     |
| 15 | E2, S2 | [EC:2.5.1.47]                  | K01738 | ko00270 | cysteine synthase                          |
| 16 | L1     | [EC:4.4.1.11]                  | K01761 | ko00270 | methionine-gamma-lyase                     |
| 17 | L2     | [EC:2.6.1.58 2.6.1.28]         | K05821 | ko00270 | aromatic amino acid aminotransferase       |
| 18 | L2     | [EC:2.6.1.57 2.6.1.27 2.6.1.5] | K00838 | ko00270 | aromatic amino acid aminotransferase       |
| 19 | L3     | [EC:4.1.1.1]                   | K01568 | ko00010 | pyruvate decarboxylase                     |
| 20 | L3     | [EC:4.1.1.-]                   | K12732 | ko00360 | phenylpyruvate decarboxylase               |
| 21 | L4     | [EC:1.1.2.8]                   | K00114 | ko00010 | alcohol dehydrogenase (cytochrome c)       |
| 22 | L4     | [EC:1.1.1.2]                   | K00002 | ko00010 | alcohol dehydrogenase (NADP+)              |
| 23 | L4     | [EC:1.1.1.1]                   | K00001 | ko00010 | alcohol dehydrogenase                      |
| 24 | L4     | [EC:1.1.1.1]                   | K13953 | ko00010 | alcohol dehydrogenase, propanol-preferring |
| 25 | M1     | [EC:4.4.1.1]                   | K01758 | ko00270 | cystathionine gamma-lyase                  |

|    |    |               |        |         |                                         |
|----|----|---------------|--------|---------|-----------------------------------------|
| 26 | M2 | [EC:4.4.1.8]  | K01760 | ko00270 | cystathione beta-lyase                  |
| 27 | M2 | [EC:4.2.1.22] | K01697 | ko00270 | cystathionine beta-synthase             |
| 28 | M2 | [EC:2.1.1.13] | K00548 | ko00270 | 5-methyltetrahydrofolate--homocysteine  |
| 29 | M3 | [EC:2.1.1.10] | K00547 | ko00270 | homocysteine S-methyltransferase        |
| 30 | M3 | [EC:2.1.1.14] | K00549 | ko00270 | 5-methyltetrahydropteroyltriglutamate-- |
| 31 | S1 | [EC:2.3.1.30] | K00640 | ko00270 | serine O-acetyltransferase              |

Table S3. The complete list of the transcription level of enzymes in sulfur metabolic pattern of microbiota in Chinese liquor fermentation

| Genera                | Transcript abundance (FPKM) |      |       |      | Reactions | Enzymes                                            |
|-----------------------|-----------------------------|------|-------|------|-----------|----------------------------------------------------|
|                       | 3-1                         | 3-2  | 10-1  | 10-2 |           |                                                    |
| <i>Kazachstania</i>   | 0.0                         | 0.0  | 0.0   | 6.3  | A1        | Aspartate kinase [EC:2.7.2.4]                      |
| <i>Lactobacillus</i>  | 0.3                         | 0.4  | 166.5 | 31.9 | A1        | Aspartate kinase [EC:2.7.2.4]                      |
| <i>Oceanobacillus</i> | 0.0                         | 2.4  | 0.0   | 0.0  | A1        | Aspartate kinase [EC:2.7.2.4]                      |
| <i>Ogataea</i>        | 0.3                         | 2.7  | 0.4   | 0.3  | A1        | Aspartate kinase [EC:2.7.2.4]                      |
| <i>Penicillium</i>    | 0.1                         | 1.5  | 0.0   | 0.0  | A1        | Aspartate kinase [EC:2.7.2.4]                      |
| <i>Saccharomyces</i>  | 37.5                        | 39.2 | 81.4  | 11.6 | A1        | Aspartate kinase [EC:2.7.2.4]                      |
| <i>Sporosarcina</i>   | 0.0                         | 13.9 | 0.0   | 0.0  | A1        | Aspartate kinase [EC:2.7.2.4]                      |
| <i>Virgibacillus</i>  | 0.0                         | 4.1  | 0.0   | 0.0  | A1        | Aspartate kinase [EC:2.7.2.4]                      |
| <i>Kazachstania</i>   | 1.0                         | 2.9  | 0.9   | 0.8  | A1        | Aspartate-semialdehyde dehydrogenase [EC:1.2.1.11] |

|                       |      |       |       |      |    |                                                    |
|-----------------------|------|-------|-------|------|----|----------------------------------------------------|
| <i>Lactobacillus</i>  | 0.3  | 0.2   | 286.2 | 49.5 | A1 | Aspartate-semialdehyde dehydrogenase [EC:1.2.1.11] |
| <i>Oceanobacillus</i> | 0.1  | 33.6  | 0.0   | 0.0  | A1 | Aspartate-semialdehyde dehydrogenase [EC:1.2.1.11] |
| <i>Saccharomyces</i>  | 55.8 | 66.7  | 6.8   | 2.8  | A1 | Aspartate-semialdehyde dehydrogenase [EC:1.2.1.11] |
| <i>Sporosarcina</i>   | 57.2 | 141.0 | 293.9 | 54.1 | A1 | Aspartate-semialdehyde dehydrogenase [EC:1.2.1.11] |
| <i>Virgibacillus</i>  | 0.1  | 3.2   | 0.0   | 0.0  | A1 | Aspartate-semialdehyde dehydrogenase [EC:1.2.1.11] |
| <i>Ogataea</i>        | 0.6  | 1.8   | 0.3   | 0.3  | A2 | Homoserine dehydrogenase [EC:1.1.1.3]              |
| <i>Sporosarcina</i>   | 0.0  | 2.8   | 0.0   | 0.0  | A2 | Homoserine dehydrogenase [EC:1.1.1.3]              |
| <i>Saccharomyces</i>  | 92.6 | 110.2 | 6.4   | 3.3  | A2 | Homoserine dehydrogenase [EC:1.1.1.3]              |
| <i>Sporosarcina</i>   | 0.0  | 1.4   | 0.0   | 0.0  | A3 | Homoserine O-succinyltransferase [EC:2.3.1.46]     |
| <i>Naumovozya</i>     | 0.0  | 0.1   | 0.0   | 5.8  | A4 | Cystathionine gamma-synthase [EC:2.5.1.48]         |
| <i>Ogataea</i>        | 0.0  | 0.4   | 0.0   | 0.0  | A4 | Cystathionine gamma-synthase [EC:2.5.1.48]         |
| <i>Brettanomyces</i>  | 1.1  | 4.2   | 0.0   | 1.4  | A4 | Cystathionine gamma-synthase [EC:2.5.1.48]         |

|                      |      |      |      |      |    |                                                |
|----------------------|------|------|------|------|----|------------------------------------------------|
| <i>Saccharomyces</i> | 63.1 | 60.2 | 63.2 | 11.7 | A4 | Cystathionine gamma-synthase [EC:2.5.1.48]     |
| <i>Kazachstania</i>  | 0.0  | 0.0  | 0.0  | 8.3  | A5 | Homoserine O-acetyltransferase [EC:2.3.1.31]   |
| <i>Sporosarcina</i>  | 0.0  | 0.7  | 0.0  | 0.0  | A5 | Homoserine O-acetyltransferase [EC:2.3.1.31]   |
| <i>Naumovozya</i>    | 1.1  | 0.0  | 0.2  | 4.8  | A5 | Homoserine O-acetyltransferase [EC:2.3.1.31]   |
| <i>Ogataea</i>       | 0.9  | 2.0  | 0.4  | 0.0  | A5 | Homoserine O-acetyltransferase [EC:2.3.1.31]   |
| <i>Penicillium</i>   | 0.1  | 5.2  | 0.3  | 0.0  | A5 | Homoserine O-acetyltransferase [EC:2.3.1.31]   |
| <i>Saccharomyces</i> | 38.7 | 45.1 | 35.5 | 4.8  | A5 | Homoserine O-acetyltransferase [EC:2.3.1.31]   |
| <i>Naumovozya</i>    | 0.0  | 0.1  | 0.0  | 5.8  | A6 | Cystathionine gamma-synthase [EC:2.5.1.48]     |
| <i>Ogataea</i>       | 0.0  | 0.4  | 0.0  | 0.0  | A6 | Cystathionine gamma-synthase [EC:2.5.1.48]     |
| <i>Brettanomyces</i> | 1.1  | 4.2  | 0.0  | 1.4  | A6 | Cystathionine gamma-synthase [EC:2.5.1.48]     |
| <i>Saccharomyces</i> | 63.1 | 60.2 | 63.2 | 11.7 | A6 | Cystathionine gamma-synthase [EC:2.5.1.48]     |
| <i>Naumovozya</i>    | 0.0  | 0.1  | 0.0  | 5.8  | A7 | O-acetylhomoserine (thiol)-lyase [EC:2.5.1.49] |

|                      |       |       |       |       |    |                                                   |
|----------------------|-------|-------|-------|-------|----|---------------------------------------------------|
| <i>Kazachstania</i>  | 0.0   | 0.2   | 0.0   | 19.3  | A7 | O-acetylhomoserine (thiol)-lyase [EC:2.5.1.49]    |
| <i>Ogataea</i>       | 0.0   | 0.4   | 0.0   | 0.0   | A7 | O-acetylhomoserine (thiol)-lyase [EC:2.5.1.49]    |
| <i>Sporosarcina</i>  | 0.0   | 8.0   | 0.0   | 0.0   | A7 | O-acetylhomoserine (thiol)-lyase [EC:2.5.1.49]    |
| <i>Virgibacillus</i> | 0.0   | 2.5   | 0.0   | 0.0   | A7 | O-acetylhomoserine (thiol)-lyase [EC:2.5.1.49]    |
| <i>Brettanomyces</i> | 1.1   | 4.2   | 0.0   | 1.4   | A7 | O-acetylhomoserine (thiol)-lyase [EC:2.5.1.49]    |
| <i>Saccharomyces</i> | 198.0 | 294.9 | 77.0  | 15.6  | A7 | O-acetylhomoserine (thiol)-lyase [EC:2.5.1.49]    |
| <i>Bacillus</i>      | 0.0   | 0.2   | 0.0   | 0.0   | C1 | S-adenosylmethionine synthetase [EC:2.5.1.6]      |
| <i>Lactobacillus</i> | 1.0   | 0.5   | 413.2 | 54.7  | C1 | S-adenosylmethionine synthetase [EC:2.5.1.6]      |
| <i>Naumovozyma</i>   | 0.7   | 0.8   | 0.0   | 2.1   | C1 | S-adenosylmethionine synthetase [EC:2.5.1.6]      |
| <i>Saccharomyces</i> | 260.2 | 370.7 | 35.3  | 8.5   | C1 | S-adenosylmethionine synthetase [EC:2.5.1.6]      |
| <i>Sporosarcina</i>  | 0.0   | 16.7  | 0.0   | 0.0   | C1 | S-adenosylmethionine synthetase [EC:2.5.1.6]      |
| <i>Lactobacillus</i> | 0.8   | 0.5   | 13.7  | 813.6 | C2 | DNA (cytosine-5-)-methyltransferase [EC:2.1.1.37] |

|                       |       |       |       |        |    |                                                                         |
|-----------------------|-------|-------|-------|--------|----|-------------------------------------------------------------------------|
| <i>Bacillus</i>       | 0.0   | 2.3   | 0.0   | 0.0    | C2 | DNA (cytosine-5-)-methyltransferase [EC:2.1.1.37]                       |
| <i>Naumovozya</i>     | 0.5   | 0.2   | 0.0   | 0.0    | C3 | Adenosylhomocysteinase [EC:3.3.1.1]                                     |
| <i>Ogataea</i>        | 0.2   | 0.8   | 1.2   | 0.0    | C3 | Adenosylhomocysteinase [EC:3.3.1.1]                                     |
| <i>Saccharomyces</i>  | 237.3 | 294.5 | 18.0  | 28.2   | C3 | Adenosylhomocysteinase [EC:3.3.1.1]                                     |
| <i>Lactobacillus</i>  | 2.9   | 0.3   | 561.6 | 1466.9 | C4 | S-adenosylhomocysteine/5'-methylthioadenosine nucleosidase [EC:3.2.2.9] |
| <i>Oceanobacillus</i> | 0.0   | 2.8   | 0.2   | 0.0    | C4 | S-adenosylhomocysteine/5'-methylthioadenosine nucleosidase [EC:3.2.2.9] |
| <i>Sporosarcina</i>   | 0.0   | 2.9   | 0.0   | 0.0    | C4 | S-adenosylhomocysteine/5'-methylthioadenosine nucleosidase [EC:3.2.2.9] |
| <i>Sporosarcina</i>   | 0.1   | 2.7   | 0.0   | 0.0    | C5 | S-ribosylhomocysteine lyase [EC:4.4.1.21]                               |
| <i>Virgibacillus</i>  | 0.1   | 3.1   | 0.0   | 0.0    | C5 | S-ribosylhomocysteine lyase [EC:4.4.1.21]                               |

|                      |      |       |      |      |    |                                                                     |
|----------------------|------|-------|------|------|----|---------------------------------------------------------------------|
| <i>Kazachstania</i>  | 0.0  | 0.0   | 0.0  | 14.7 | E1 | Sulfite reductase (NADPH) flavoprotein alpha-component [EC:1.8.1.2] |
| <i>Sporosarcina</i>  | 0.0  | 1.0   | 0.0  | 0.0  | E1 | Sulfite reductase (NADPH) flavoprotein alpha-component [EC:1.8.1.2] |
| <i>Penicillium</i>   | 0.0  | 1.7   | 0.2  | 0.0  | E1 | Sulfite reductase (NADPH) flavoprotein alpha-component [EC:1.8.1.2] |
| <i>Ogataea</i>       | 0.6  | 1.9   | 0.2  | 0.8  | E1 | Sulfite reductase (NADPH) flavoprotein alpha-component [EC:1.8.1.2] |
| <i>Naumovozyma</i>   | 3.4  | 0.9   | 0.2  | 0.3  | E1 | Sulfite reductase (NADPH) flavoprotein alpha-component [EC:1.8.1.2] |
| <i>Saccharomyces</i> | 80.6 | 102.0 | 17.0 | 10.7 | E1 | Sulfite reductase (NADPH) flavoprotein alpha-component [EC:1.8.1.2] |
| <i>Kazachstania</i>  | 0.0  | 0.0   | 0.0  | 4.1  | E1 | Sulfite reductase (NADPH) hemoprotein beta-component [EC:1.8.1.2]   |
| <i>Naumovozyma</i>   | 0.0  | 0.0   | 0.0  | 7.6  | E1 | Sulfite reductase (NADPH) hemoprotein beta-component [EC:1.8.1.2]   |
| <i>Bacillus</i>      | 0.0  | 0.6   | 0.0  | 0.0  | E1 | Sulfite reductase (NADPH) hemoprotein beta-component [EC:1.8.1.2]   |
| <i>Sporosarcina</i>  | 0.0  | 1.2   | 0.0  | 0.0  | E1 | Sulfite reductase (NADPH) hemoprotein beta-component [EC:1.8.1.2]   |
| <i>Penicillium</i>   | 0.2  | 5.0   | 1.0  | 0.2  | E1 | Sulfite reductase (NADPH) hemoprotein beta-component [EC:1.8.1.2]   |
| <i>Ogataea</i>       | 1.8  | 5.5   | 0.3  | 0.6  | E1 | Sulfite reductase (NADPH) hemoprotein beta-component [EC:1.8.1.2]   |



|                      |      |       |     |     |    |                                                                       |
|----------------------|------|-------|-----|-----|----|-----------------------------------------------------------------------|
| <i>Saccharomyces</i> | 53.7 | 66.7  | 6.4 | 7.8 | E1 | Sulfite reductase (NADPH) hemoprotein beta-component [EC:1.8.1.2]     |
| <i>Kuraishia</i>     | 0.0  | 0.5   | 0.0 | 0.0 | E2 | Cysteine synthase A [EC:2.5.1.47]                                     |
| <i>Ogataea</i>       | 7.0  | 13.4  | 0.7 | 1.0 | E2 | Cysteine synthase A [EC:2.5.1.47]                                     |
| <i>Saccharomyces</i> | 19.5 | 22.6  | 6.9 | 2.5 | E2 | Cysteine synthase A [EC:2.5.1.47]                                     |
| <i>Sporosarcina</i>  | 0.2  | 24.5  | 0.0 | 0.0 | E2 | Cysteine synthase A [EC:2.5.1.47]                                     |
| <i>Virgibacillus</i> | 0.2  | 27.2  | 0.0 | 0.0 | E2 | Cysteine synthase A [EC:2.5.1.47]                                     |
| <i>Sporosarcina</i>  | 0.0  | 10.0  | 0.0 | 0.0 | L1 | Methionine-gamma-lyase [EC:4.4.1.11]                                  |
| <i>Naumovozya</i>    | 0.0  | 0.2   | 0.0 | 4.9 | L2 | Aromatic amino acid aminotransferase I [EC:2.6.1.57 2.6.1.27 2.6.1.5] |
| <i>Brettanomyces</i> | 0.6  | 1.1   | 0.6 | 0.4 | L2 | Aromatic amino acid aminotransferase I [EC:2.6.1.57 2.6.1.27 2.6.1.5] |
| <i>Naumovozya</i>    | 1.3  | 0.7   | 0.0 | 0.0 | L2 | Aromatic amino acid aminotransferase I [EC:2.6.1.57 2.6.1.27 2.6.1.5] |
| <i>Saccharomyces</i> | 91.4 | 109.9 | 7.1 | 1.7 | L2 | Aromatic amino acid aminotransferase I [EC:2.6.1.57 2.6.1.27 2.6.1.5] |
| <i>Brettanomyces</i> | 0.0  | 0.0   | 0.2 | 0.9 | L2 | Aromatic amino acid aminotransferase II [EC:2.6.1.58 2.6.1.28]        |

|                      |        |        |        |        |    |                                                                |
|----------------------|--------|--------|--------|--------|----|----------------------------------------------------------------|
| <i>Kazachstania</i>  | 0.0    | 0.0    | 0.0    | 0.9    | L2 | Aromatic amino acid aminotransferase II [EC:2.6.1.58 2.6.1.28] |
| <i>Saccharomyces</i> | 24.6   | 4.7    | 5.6    | 6.9    | L2 | Aromatic amino acid aminotransferase II [EC:2.6.1.58 2.6.1.28] |
| <i>Brettanomyces</i> | 0.8    | 0.0    | 0.0    | 0.0    | L3 | Pyruvate decarboxylase [EC:4.1.1.1]                            |
| <i>Kazachstania</i>  | 0.0    | 5.4    | 0.0    | 0.0    | L3 | Pyruvate decarboxylase [EC:4.1.1.1]                            |
| <i>Kuraishia</i>     | 75.0   | 309.1  | 17.9   | 15.4   | L3 | Pyruvate decarboxylase [EC:4.1.1.1]                            |
| <i>Naumovozya</i>    | 2.9    | 14.0   | 0.0    | 0.5    | L3 | Pyruvate decarboxylase [EC:4.1.1.1]                            |
| <i>Ogataea</i>       | 1.5    | 1.4    | 0.0    | 0.0    | L3 | Pyruvate decarboxylase [EC:4.1.1.1]                            |
| <i>Penicillium</i>   | 1.4    | 1.2    | 2.6    | 0.7    | L3 | Pyruvate decarboxylase [EC:4.1.1.1]                            |
| <i>Saccharomyces</i> | 9784.1 | 9352.4 | 2680.9 | 1105.5 | L3 | Pyruvate decarboxylase [EC:4.1.1.1]                            |
| <i>Saccharomyces</i> | 2.4    | 3.9    | 0.5    | 0.5    | L3 | Phenylpyruvate decarboxylase [EC:4.1.1.-]                      |
| <i>Lactobacillus</i> | 1.2    | 1.1    | 1851.9 | 184.3  | L4 | Alcohol dehydrogenase, propanol-preferring [EC:1.1.1.1]        |
| <i>Saccharomyces</i> | 3020.2 | 3377.0 | 239.4  | 341.0  | L4 | Alcohol dehydrogenase, propanol-preferring [EC:1.1.1.1]        |

|                      |       |       |      |       |    |                                                   |
|----------------------|-------|-------|------|-------|----|---------------------------------------------------|
| <i>Lactobacillus</i> | 0.2   | 0.0   | 13.3 | 140.1 | L4 | Alcohol dehydrogenase [EC:1.1.1.1]                |
| <i>Bacillus</i>      | 0.0   | 15.0  | 0.0  | 0.0   | L4 | Alcohol dehydrogenase [EC:1.1.1.1]                |
| <i>Saccharomyces</i> | 14.5  | 18.4  | 4.2  | 1.2   | L4 | Alcohol dehydrogenase [EC:1.1.1.1]                |
| <i>Saccharomyces</i> | 84.9  | 93.6  | 17.0 | 5.7   | L4 | Alcohol dehydrogenase (NADP+) [EC:1.1.1.2]        |
| <i>Acetobacter</i>   | 0.7   | 0.0   | 3.3  | 0.8   | L4 | Alcohol dehydrogenase (cytochrome c) [EC:1.1.2.8] |
| <i>Penicillium</i>   | 0.0   | 1.5   | 0.0  | 0.0   | M1 | Cystathionine gamma-lyase [EC:4.4.1.1]            |
| <i>Naumovozyma</i>   | 6.0   | 3.0   | 0.0  | 0.0   | M1 | Cystathionine gamma-lyase [EC:4.4.1.1]            |
| <i>Saccharomyces</i> | 103.3 | 173.8 | 8.2  | 8.8   | M1 | Cystathionine gamma-lyase [EC:4.4.1.1]            |
| <i>Bacillus</i>      | 0.1   | 7.4   | 0.0  | 0.0   | M2 | Cystathione beta-lyase [EC:4.4.1.8]               |
| <i>Penicillium</i>   | 0.0   | 0.5   | 0.0  | 0.0   | M2 | Cystathione beta-lyase [EC:4.4.1.8]               |
| <i>Saccharomyces</i> | 10.9  | 9.1   | 13.7 | 3.3   | M2 | Cystathione beta-lyase [EC:4.4.1.8]               |
| <i>Sporosarcina</i>  | 0.0   | 18.4  | 0.1  | 0.0   | M2 | Cystathione beta-lyase [EC:4.4.1.8]               |

|                      |       |       |      |      |    |                                                                                     |
|----------------------|-------|-------|------|------|----|-------------------------------------------------------------------------------------|
| <i>Penicillium</i>   | 0.2   | 0.4   | 0.0  | 0.8  | M2 | Cystathionine beta-synthase [EC:4.2.1.22]                                           |
| <i>Naumovozyma</i>   | 3.2   | 1.9   | 0.5  | 1.2  | M2 | Cystathionine beta-synthase [EC:4.2.1.22]                                           |
| <i>Saccharomyces</i> | 144.7 | 134.8 | 20.2 | 5.3  | M2 | Cystathionine beta-synthase [EC:4.2.1.22]                                           |
| <i>Kazachstania</i>  | 0.0   | 0.4   | 0.1  | 17.1 | M3 | 5-Methyltetrahydropteroyltriglutamate--homocysteine methyltransferase [EC:2.1.1.14] |
| <i>Bacillus</i>      | 0.0   | 1.0   | 0.0  | 0.0  | M3 | 5-Methyltetrahydropteroyltriglutamate--homocysteine methyltransferase [EC:2.1.1.14] |
| <i>Penicillium</i>   | 0.2   | 2.6   | 0.5  | 1.2  | M3 | 5-Methyltetrahydropteroyltriglutamate--homocysteine methyltransferase [EC:2.1.1.14] |
| <i>Komagataella</i>  | 2.6   | 1.3   | 0.0  | 1.6  | M3 | 5-Methyltetrahydropteroyltriglutamate--homocysteine methyltransferase [EC:2.1.1.14] |

|                      |       |       |      |      |    |                                                                                        |
|----------------------|-------|-------|------|------|----|----------------------------------------------------------------------------------------|
| <i>Sporosarcina</i>  | 0.1   | 5.3   | 0.0  | 0.0  | M3 | 5-Methyltetrahydropteroyltriglutamate--homocysteine methyltransferase<br>[EC:2.1.1.14] |
| <i>Ogataea</i>       | 3.5   | 6.9   | 1.8  | 0.5  | M3 | 5-Methyltetrahydropteroyltriglutamate--homocysteine methyltransferase<br>[EC:2.1.1.14] |
| <i>Saccharomyces</i> | 214.4 | 333.3 | 19.8 | 8.9  | M3 | 5-Methyltetrahydropteroyltriglutamate--homocysteine methyltransferase<br>[EC:2.1.1.14] |
| <i>Bacillus</i>      | 0.0   | 1.4   | 0.0  | 0.0  | M3 | Homocysteine S-methyltransferase [EC:2.1.1.10]                                         |
| <i>Saccharomyces</i> | 7.4   | 8.9   | 2.9  | 0.8  | M3 | Homocysteine S-methyltransferase [EC:2.1.1.10]                                         |
| <i>Sporosarcina</i>  | 0.0   | 7.0   | 0.0  | 0.1  | M3 | 5-Methyltetrahydrofolate--homocysteine methyltransferase<br>[EC:2.1.1.13]              |
| <i>Truepera</i>      | 0.1   | 0.0   | 0.4  | 12.0 | S1 | Serine O-acetyltransferase [EC:2.3.1.30]                                               |
| <i>Virgibacillus</i> | 0.0   | 0.7   | 0.0  | 0.0  | S1 | Serine O-acetyltransferase [EC:2.3.1.30]                                               |

|                      |      |      |     |     |    |                                   |
|----------------------|------|------|-----|-----|----|-----------------------------------|
| <i>Kuraishia</i>     | 0.0  | 0.5  | 0.0 | 0.0 | S2 | Cysteine synthase A [EC:2.5.1.47] |
| <i>Ogataea</i>       | 7.0  | 13.4 | 0.7 | 1.0 | S2 | Cysteine synthase A [EC:2.5.1.47] |
| <i>Saccharomyces</i> | 19.5 | 22.6 | 6.9 | 2.5 | S2 | Cysteine synthase A [EC:2.5.1.47] |
| <i>Sporosarcina</i>  | 0.2  | 24.5 | 0.0 | 0.0 | S2 | Cysteine synthase A [EC:2.5.1.47] |
| <i>Virgibacillus</i> | 0.2  | 27.2 | 0.0 | 0.0 | S2 | Cysteine synthase A [EC:2.5.1.47] |
